# Supplementary material
Source: publisher figshare collection journal article supplement (https://tandf.figshare.com/articles/dataset/_/16577481)
Supplement: Supplementary file 1 [file 1]

**Clarifying confusion - *Prorocentrum triestinum* J.Schiller and  
*Prorocentrum redfieldii* Bursa (Prorocentrales, Dinophyceae) are  
two different species**

Urban Tillmann\*, Alfred Beran, Marc Gottschling, Stephan Wietkamp, Mona Hoppenrath\*

**Supplementary Information**

## Tables

**Table S1: Voucher list.** All names are given under the rules of the ICN, the author standard forms follow Brummitt & Powell (1992). Abbreviation: n. inf., no information; s.n., without number. If ‘holotype’ or ‘epitype’ is noted for a species name, then it refers to material, from which the type was prepared.

| species name with author(s)                                                                                            | strain No. | locality                                                                                            | date            | collector(s)             | GenBankNo(s)                                                               | reference                                                             |
|------------------------------------------------------------------------------------------------------------------------|------------|-----------------------------------------------------------------------------------------------------|-----------------|--------------------------|----------------------------------------------------------------------------|-----------------------------------------------------------------------|
| <i>Adenoides eludens</i> (Herdman)<br>Balech                                                                           | ADE2       | eastern North Atlantic, off<br>France: Hauts-de-France,<br>Wimereux (50°46'N, 1°37'E)               | Jun,<br>2011    | n.inf.                   | LC002839 (SSU),<br>LC002844 (LSU)                                          | Gómez <i>et al.</i><br>(2015)                                         |
| <i>Chrysodinium ballux</i> (N.Yamada,<br>Dawut, R.Terada & T.Horig.)<br>F.Gómez, Y.Nakam. & L.F.Artigas<br>(holotype)  | HG177      | western North Pacific, off<br>Japan: Kyūshū, Kagoshima,<br>Takeshima (30°49'N, 130°24'E)            | May 10,<br>2011 | T. Horiguchi             | LC054938 (SSU),<br>LC375159 (LSU)                                          | Yamada <i>et al.</i><br>(2019)                                        |
| <i>Plagiodinium belizeanum</i><br>M.A.Faust & Balech                                                                   | KW001      | western North Pacific, East<br>China Sea, off Japan: Okinawa,<br>Itoman, Odo (26°04'N,<br>127°41'E) | Apr 15,<br>2015 | n.inf.                   | KX008973 (SSU),<br>KX008972 (LSU)                                          | Wakeman <i>et al.</i><br>(2018)                                       |
| <i>Plagiodinium</i> sp.                                                                                                | HG225      | western North Pacific, off<br>Japan: Kyūshū, Kagoshima,<br>Takeshima (30°49'N, 130°24'E)            | May 30,<br>2011 | T. Horiguchi             | LC054937 (SSU),<br>LC375160 (LSU)                                          | Yamada <i>et al.</i> ,<br>(2019)                                      |
| <i>Prorocentrum concavum</i> Fukuyo<br>(holotype of <i>Prorocentrum</i><br><i>arabianum</i> S.L.Morton &<br>M.A.Faust) | NCMA1724   | western Indian Ocean, Arabian<br>Sea, Gulf of Oman, off Oman<br>(23°34'N, 58°52'E)                  | May,<br>1995    | J. Stirn [S. Brett] OM-3 | EU927555 (ITS),<br>DQ336184 (LSU)                                          | Ferrell & Beaton<br>(unpubl. 2008),<br>Murray <i>et al.</i><br>(2007) |
| <i>Prorocentrum cordatum</i><br>(Ostenf.) J.D.Dodge                                                                    | D-127      | eastern Indian Ocean, off South<br>Korea: Tongyeong                                                 | n.inf.          | n.inf.                   | JX402086 (rRNA),<br>JN831315 (hsp90),<br>JF715156 (act), JF715158<br>(tub) | Cheon & Ki<br>(unpubl. 2013)                                          |
| <i>Prorocentrum</i> cf. <i>emarginatum</i><br>Fukuyo                                                                   | X2P3       | western North Pacific, South<br>China Sea, off China: Hainan,<br>Sanya (18°14'N, 109°22'E)          | Aug 19,<br>2014 | n.inf.                   | KY010245 (ITS),<br>KY010260 (LSU)                                          | Luo <i>et al.</i> (2017)                                              |

|                                                                                        |                     |                                                                                              |              |                            |                                                                              |                                                              |
|----------------------------------------------------------------------------------------|---------------------|----------------------------------------------------------------------------------------------|--------------|----------------------------|------------------------------------------------------------------------------|--------------------------------------------------------------|
| <i>Prorocentrum foveolatum</i><br>Croome & P.A.Tyler (reference material)              | PFBL01              | Australia: Tasmania, Bruny Island, Big Lagoon                                                | Feb, 2002    | [I. Pearce] s.n.           | AY259173 (LSU)                                                               | Pearce & Hallegraeff (2004)                                  |
| <i>Prorocentrum fukuyoi</i> Sh.Murray & Y.Nagahama (holotype)                          | SM19 (≡ CS867)      | western South Pacific, Tasman Sea, off Australia: Sydney, Port Botany (34°00'S, 151°14'E)    | Apr, 2003    | n.inf.                     | DQ336191 (LSU)                                                               | Murray <i>et al.</i> (2007, 2009)                            |
| <i>Prorocentrum fukuyoi</i> Sh.Murray & Y.Nagahama                                     | W091                | South China Sea                                                                              | n.inf.       | n.inf.                     | MK547117 (SSU),<br>MK605054 (ITS),<br>MK605081 (LSU),<br>MK544031 (LSUd8d10) | Yiu <i>et al.</i> (unpubl. 2020)                             |
| <i>Prorocentrum gracile</i> F.Schütt                                                   | W089                | South China Sea                                                                              | n.inf.       | n.inf.                     | MK547125 (SSU),<br>MK605061 (ITS),<br>MG914043 (LSU),<br>MK544040 (LSUd8d10) | Yiu <i>et al.</i> (unpubl. 2020)                             |
| <i>Prorocentrum hoffmannianum</i><br>M.A.Faust                                         | NCMA683 (≡ PL200A)  | western North Atlantic, off USA—FL: Knight Key (24°42'N, 81°08'W)                            | Nov 1, 1985  | J. Bomber [J. Bomber] s.n. | KF885225 (SSU+ITS+LSU),<br>KC622310 (SSU+ITS+LSU)                            | Lee (unpubl. 2013), Herrera Sepúlveda <i>et al.</i> (2015)   |
| <i>Prorocentrum koreanum</i><br>M.S.Han, S.Y.Cho & P.B.Wang (holotype)                 | LMBEV9              | eastern Indian Ocean, East China Sea, off South Korea: Jangmok                               | n.inf.       | n.inf.                     | KP711350 (SSU),<br>KP711351 (ITS),<br>KP711352 (LSU)                         | Han <i>et al.</i> (2016)                                     |
| <i>Prorocentrum leve</i> M.A.Faust, Kibler, Vandersea, P.A.Tester & Litaker (holotype) | NCMA2634            | western North Atlantic, Caribbean Sea, off Belize: Stann Creek, Twin Cays (16°50'N, 88°06'W) | May 21, 2002 | S. Kibler [S. Kibler] s.n. | DQ238043 (SSU+ITS+LSU)                                                       | Faust <i>et al.</i> (2008)                                   |
| <i>Prorocentrum lima</i> (Ehrenb.)<br>F.Stein                                          | NCMA685 (≡ PL2V)    | eastern North Atlantic, off Spain: Ria de Vigo (42°14'N, 8°48'W)                             | n.inf.       | I. Bravo s.n.              | AB189765 (ITS),<br>DQ336179 (LSU)                                            | Murray <i>et al.</i> (2009), Nagahama <i>et al.</i> (2011)   |
| <i>Prorocentrum lima</i> (Ehrenb.)<br>F.Stein                                          | NCMA1370 (≡ FIT#69) | western North Atlantic, off USA—FL: Knight Key (24°42'N, 81°08'W)                            | n.inf.       | J. Bomber s.n.             | EU927507 (ITS),<br>DQ336180 (LSU)                                            | Ferrell & Beaton (unpubl. 2008), Murray <i>et al.</i> (2009) |

|                                                                                            |                       |                                                                                                        |                 |                                             |                                                      |                                                                        |
|--------------------------------------------------------------------------------------------|-----------------------|--------------------------------------------------------------------------------------------------------|-----------------|---------------------------------------------|------------------------------------------------------|------------------------------------------------------------------------|
| <i>Prorocentrum lima</i> (Ehrenb.)<br>F.Stein (epitype of <i>Exuviaella marina</i> Cienk.) | NCMA1743<br>(≡ PA)    | Atlantic Ocean, off Canada:<br>Nova Scotia, Lunenburg,<br>Mahone Bay (44°30'N, 64°10'W)                | n.inf.          | [C. Brown & N. Lewis] s.n.                  | AB189767 (ITS)                                       | Ferrell & Beaton<br>(unpubl. 2008)<br>Nagahama <i>et al.</i><br>(2011) |
| <i>Prorocentrum micans</i> Ehrenb.<br>(epitype)                                            | A10                   | Baltic Sea, off Germany:<br>Schleswig-Holstein, Kiel<br>(54°21'N, 10°09'E)                             | Oct 20,<br>2017 | K.J.S. Meier [U. Tillmann<br>A10] s.n.      | MK405477 (rRNA)                                      | Tillmann <i>et al.</i><br>(2019)                                       |
| <i>Prorocentrum micans</i> Ehrenb.                                                         | NCMA1589<br>(≡ 992M3) | USA—RI: Narragansett Bay<br>(41°36'N, 71°24'W)                                                         | Sep 19,<br>1992 | P. Hargraves [P. Hargraves]<br>s.n.         | EU780638 (SSU+ITS+LSU)                               | Handy <i>et al.</i><br>(2009)                                          |
| <i>Prorocentrum obtusidens</i><br>J.Schiller (chimeric)                                    | n.inf.                | western North Pacific, East<br>China Sea                                                               | 2002            | S. Lin s.n.                                 | DQ336054 (SSU),<br>AY465116 (ITS),<br>AY822610 (LSU) | Zhang <i>et al.</i><br>(2004), Lin <i>et al.</i><br>(2006)             |
| <i>Prorocentrum playfairii</i> Croome<br>& P.A.Tyler (reference material)                  | PPWL01                | Australia: Tasmania, Windmill<br>Lagoon                                                                | Jan,<br>2001    | [I. Pearce] s.n.                            | AY259174 (LSU)                                       | Pearce &<br>Hallegraeff (2004)                                         |
| <i>Prorocentrum redfieldii</i> Bursa                                                       | 1032                  | Mediterranean Sea, Adriatic<br>Sea, off Italy: Friuli-Venezia<br>Giulia, Trieste (45°42'N,<br>13°42'E) | Jan 19,<br>2014 | A. Beran C1                                 | MW784567 (ITS),<br>MW784606 (LSU)                    | this study                                                             |
| <i>Prorocentrum redfieldii</i> Bursa                                                       | 1033                  | Mediterranean Sea, Adriatic<br>Sea, off Italy: Friuli-Venezia<br>Giulia, Trieste                       | Jan 21,<br>2014 | A. Beran Acegas                             | MW784602 (SSU,<br>MW784568 (ITS),<br>MW784607 (LSU)  | this study                                                             |
| <i>Prorocentrum redfieldii</i> Bursa                                                       | 1B8                   | North Sea, off Belgium<br>(51°31'N, 2°41'E)                                                            | 2018            | [Heincke] [U. Tillmann] s.n.                | MW784604 (SSU),<br>MW784570 (ITS+LSU)                | this study                                                             |
| <i>Prorocentrum redfieldii</i> Bursa                                                       | CCCM765               | n.inf.                                                                                                 | n.inf.          | n.inf.                                      | AY443019 (SSU)                                       | Saldarriaga<br>Echavarría <i>et al.</i><br>(2004)                      |
| <i>Prorocentrum redfieldii</i> Bursa                                                       | CCCM882               | n.inf.                                                                                                 | n.inf.          | n.inf.                                      | JQ972693 (ITS)                                       | Stern <i>et al.</i> (2012)                                             |
| <i>Prorocentrum redfieldii</i> Bursa                                                       | DI.D*                 | Eastern South Atlantic, off<br>South Africa: Western Cape, St<br>Helena Bay (32°43'S, 18°03'E)         | Feb 11,<br>2015 | N. Dhar, G.C. Pitcher & P.M.<br>Durand s.n. | KX786249 (SSU),<br>KX786250 (LSU)                    | Ndhlovu <i>et al.</i><br>(2017)                                        |
| <i>Prorocentrum redfieldii</i> Bursa                                                       | M53                   | Deutsche Bucht                                                                                         | 2012            | N. Gülzow                                   | MW784571 (ITS+LSU)                                   | this study                                                             |
| <i>Prorocentrum redfieldii</i> Bursa                                                       | MBIC11147             | n.inf.                                                                                                 | n.inf.          | n.inf.                                      | AB183673 (SSU)                                       | Sekiguchi <i>et al.</i><br>(unpubl. 2004)                              |

|                                      |                       |                                                                               |              |                            |                                                                         |                                                               |
|--------------------------------------|-----------------------|-------------------------------------------------------------------------------|--------------|----------------------------|-------------------------------------------------------------------------|---------------------------------------------------------------|
| <i>Prorocentrum redfieldii</i> Bursa | NCMA700 (≡ PT1)       | western North Atlantic, off USA–ME: Brunswick, Maquiot Bay (43°55'N, 69°56'W) | Oct 1, 1988  | R. Aho [R. Selvin] s.n.    | EU927549 (ITS)                                                          | Ferrell & Beaton (unpubl. 2008)                               |
| <i>Prorocentrum redfieldii</i> Bursa | NCMA1919              | western North Atlantic, off USA–NJ: (39°41'N, 74°09'W)                        | Sep 13, 1996 | P. Olson [J. Mahoney] s.n. | EU927550 (ITS)                                                          | Ferrell & Beaton (unpubl. 2008)                               |
| <i>Prorocentrum redfieldii</i> Bursa | n.inf.                | n.inf.                                                                        | n.inf.       | n.inf.                     | AF042815 (LSU)                                                          | Lee et al. (unpubl. 1998)                                     |
| <i>Prorocentrum redfieldii</i> Bursa | n.inf.                | n.inf.                                                                        | n.inf.       | n.inf.                     | AY863010 (LSU)                                                          | Wang et al. (unpubl. 2004)                                    |
| <i>Prorocentrum redfieldii</i> Bursa | n.inf.                | western North Atlantic, off USA–VA: Chincoteague Bay                          | Aug 12, 2015 | n.inf.                     | KT870117 (ITS)                                                          | Lycett & Pitula (unpubl. 2015)                                |
| <i>Prorocentrum redfieldii</i> Bursa | PT2V (≡ SCCAP K-1811) | eastern North Atlantic, off Spain: Ria de Vigo                                | Aug 23, 1989 | S. Fraga [S. Fraga] s.n.   | EU244468 (ITS)                                                          | Rial et al. (unpubl. 2007)                                    |
| <i>Prorocentrum redfieldii</i> Bursa | PT5V                  | eastern North Atlantic, off Spain: Ria de Vigo                                | n.inf.       | n.inf.                     | L38638 (LSU), L38639 (LSUd8d10)                                         | Zardoya <i>et al.</i> (1995)                                  |
| <i>Prorocentrum redfieldii</i> Bursa | PTPP01                | Australia: Western Australia, Swan River                                      | Jul, 2001    | [M. de Salas] s.n.         | AY259168 (LSU)                                                          | Pearce & Hallegraeff (2004)                                   |
| <i>Prorocentrum redfieldii</i> Bursa | PtriC                 | n.inf.                                                                        | n.inf.       | n.inf.                     | DQ004734 (SSU)                                                          | Wang et al. (unpubl. 2005)                                    |
| <i>Prorocentrum redfieldii</i> Bursa | S019                  | South China Sea                                                               | n.inf.       | n.inf.                     | MK547148 (SSU), MG914046 (ITS+LSU), MK605103 (LSU), MK544064 (LSUd8d10) | Yiu et al. (unpubl. 2019)                                     |
| <i>Prorocentrum redfieldii</i> Bursa | UTEX1657              | eastern North Pacific, off USA–CA: San Diego, La Jolla                        | spring, 1966 | A.R. Loeblich III s.n.     | EF492512 (SSU), EU927551 (ITS)                                          | Ferrell & Beaton (unpubl. 2008), Leblond <i>et al.</i> (2010) |
| <i>Prorocentrum redfieldii</i> Bursa | W010                  | South China Sea                                                               | n.inf.       | n.inf.                     | MK547149 (SSU), MK605079 (ITS), MK605104 (LSU), MK544065 (LSUd8d10)     | Yiu et al. (unpubl. 2019)                                     |

|                                                                                 |                                   |                                                                                                            |              |                            |                                                      |                                                                       |
|---------------------------------------------------------------------------------|-----------------------------------|------------------------------------------------------------------------------------------------------------|--------------|----------------------------|------------------------------------------------------|-----------------------------------------------------------------------|
| <i>Prorocentrum rhathymum</i><br>A.R.LoebL., Sherley & R.J.Schmidt              | NMN16                             | western North Pacific, South China Sea, off Malaysia: Sabah                                                | n.inf.       | n.inf.                     | FJ842096 (SSU),<br>FJ155840 (ITS), EF566745 (LSU)    | Mohammad-Noor <i>et al.</i> (2007),<br>Caillaud <i>et al.</i> (2010)  |
| <i>Prorocentrum rhathymum</i><br>A.R.LoebL., Sherley & R.J.Schmidt              | PRJJ1                             | western North Pacific, East China Sea, off Republic of South Korea: Jeju (33°52'N, 126°54'E)               | Feb, 2009    | n.inf.                     | HF565181 (SSU+ITS+LSU)                               | Lim <i>et al.</i> (2013)                                              |
| <i>Prorocentrum steidingeriae</i><br>F.Gómez, D.J.Qiu & Senjie Lin (holotype)   | NCMA687 (≡<br>FIT#182,<br>PM200A) | western North Atlantic, off USA–FL: Knight Key (24°42'N, 81°08'W)                                          | Nov 1, 1985  | J. Bomber [J. Bomber] s.n. | EU287485 (SSU),<br>EU927554 (ITS),<br>DQ336183 (LSU) | Murray <i>et al.</i> (2007, 2009),<br>Ferrell & Beaton (unpubl. 2008) |
| <i>Prorocentrum texanum</i> Henrichs, Steid., P.S.Scott & L.Campbell (holotype) | PrTX B                            | USA–TX: Ship Channel, Port Aransas (27°50'N, 97°03'W)                                                      | Feb 3, 2010  | D.W. Henrichs s.n.         | JQ390504 (SSU),<br>JQ390505 (ITS+LSU)                | Henrichs <i>et al.</i> (2013)                                         |
| <i>Prorocentrum triestinum</i><br>J.Schiller (epitype)                          | 1069                              | Mediterranean Sea, Adriatic Sea, off Italy: Friuli-Venezia Giulia, Trieste, Santa Croce (45°44'N, 13°41'E) | Sep 19, 2018 | A. Beran s.n.              | MW784603 (SSU),<br>MW784569 (ITS),<br>MW784608 (LSU) | this study                                                            |
| <i>Pseudadenoides kofoidii</i> (Herdman) F.Gómez, R.Onuma, Artigas & T.Horig.   | PSE6                              | eastern North Atlantic, off France: Hauts-de-France, Wimereux (50°46'N, 1°37'E)                            | Jun, 2011    | n.inf.                     | LC002843 (SSU),<br>LC002848 (LSU)                    | Gómez <i>et al.</i> (2015)                                            |
| <u>outgroup</u>                                                                 |                                   |                                                                                                            |              |                            |                                                      |                                                                       |
| <i>Amphisolenia bidentata</i> Schröd. (chimeric as used in Orr et al. 2012)     | LE392                             | Indian Ocean, off Australia (16°02'S, 119°20'E)                                                            | fall 2006    | n.inf.                     | GU196149 (SSU),<br>FJ808682 (LSU)                    | Jensen & Daugbjerg (2009),<br>Daugbjerg <i>et al.</i> (2013)          |
| <i>Bispinodinium angelaceum</i><br>N.Yam. & T.Horig. (holotype)                 | HG236                             | western North Pacific, off Japan: Kyūshū, Kagoshima, off Mageshima (30°41' N, 130°50'E)                    | May 15, 2008 | R. Terada s.n.             | AB762397 (SSU),<br>AB762398 (LSU)                    | Yamada <i>et al.</i> (2013)                                           |
| <i>Barrufeta resplendens</i> (Hulburt)<br>H.Gu, Z.Luo & K.N.Mert.               | GM17                              | western North Atlantic, Gulf of Mexico, off USA–LA (28°52'N, 90°29'W)                                      | Jul 29, 2014 | n.inf.                     | KY688183 (SSU),<br>KT203384 (ITS),<br>KT203382 (LSU) | Gu <i>et al.</i> (2015),<br>Wang <i>et al.</i> (2017)                 |

|                                                                                                       |                          |                                                                                        |              |                                                           |                                                |                                                              |
|-------------------------------------------------------------------------------------------------------|--------------------------|----------------------------------------------------------------------------------------|--------------|-----------------------------------------------------------|------------------------------------------------|--------------------------------------------------------------|
| <i>Dinophysis acuminata</i> Clap. & J.Lachm.                                                          | clone 2                  | eastern North Atlantic, off Spain: Ría de Pontevedra (42°22'N, 8°47'W)                 | Jun 12, 2006 | n.inf.                                                    | KF871422 (SSU), AM931580 (ITS), KF871410 (LSU) | Raho & Marin (unpubl. 2013), Raho <i>et al.</i> (2008, 2013) |
| <i>Dinophysis acuminata</i> Clap. & J.Lachm.                                                          | DARU-2013                | western North Pacific, Sea of Japan, off Russia: Primorsky, Vladivostok                | Aug 25, 2013 | n.inf.                                                    | KJ508017 (SSU), KJ508016 (ITS), KJ508015 (LSU) | Efimova <i>et al.</i> (unpubl. 2014)                         |
| <i>Dinophysis caudata</i> Kent                                                                        | FTL69                    | western North Atlantic, off USA–FL: Ft. Lauderdale (26°05'N, 80°03'W)                  | Feb 26, 2008 | n.inf.                                                    | EU780644 (SSU+ITS+LSU)                         | Handy <i>et al.</i> (2009)                                   |
| Gymnodiniaceae sp.                                                                                    | uncultivated clone W8eB2 | Arctic Ocean, off Canada: Nanavut, Ellesmere Island, Ward Hunt Lake (83°05'N, 74°10'W) | Aug 15, 2008 | n.inf.                                                    | JF730844 (SSU)                                 | Charvet <i>et al.</i> (2012)                                 |
| <i>Gymnodinium aureolum</i> (Hulburt) Gert Hansen                                                     | GeoB 232                 | Mediterranean Sea, Ionian Sea, off Italy: Gulf of Taranto (40°07'N, 17°19'E)           | Oct 26, 2002 | D. Saracino [M. Kirsch] s.n.                              | KJ481834 (SSU+ITS+LSU)                         | Tillmann <i>et al.</i> (2014)                                |
| <i>Gymnodinium aureolum</i> (Hulburt) Gert Hansen                                                     | MUCC284                  | n.inf.                                                                                 | n.inf.       | n.inf.                                                    | AF022196 (SSU)                                 | Saunders <i>et al.</i> (1997)                                |
| <i>Gymnodinium baicalense</i> N.L.Antipova                                                            | LM0802 (NA-2008)         | Russia: Siberia, Lake Baikal                                                           | 2008         | n.inf.                                                    | FJ024297 (SSU), FJ024302 (LSU)                 | Annenkova <i>et al.</i> (2009)                               |
| <i>“Gymnodinium” catenatum</i> H.W.Graham                                                             | GnCt01                   | eastern Indian Ocean, East China Sea, off South Korea: Nanpo, Jinhae Bay               | n.inf.       | n.inf.                                                    | DQ785882 (rRNA)                                | Ki & Han (2007b)                                             |
| <i>Gymnodinium fuscum</i> var. <i>rubrum</i> Baumeister ex Romeikat, Knechtel & Gottschling (epitype) | GeoM*864 (≡ CCAC9044B)   | Germany: Bavaria, Traunstein, Seeon, peat pit (47°59'N, 12°26'E, 536m)                 | Jun 28, 2017 | C. Romeikat, M. Gottschling & H. Reich [C. Romeikat] D099 | MK405489 (SSU+ITS+LSU)                         | Romeikat <i>et al.</i> (2020)                                |
| <i>Gymnodinium plasticum</i> Na Wang, Z.Luo, K.N.Mert., F.M.G.McCarthy & H.Gu (holotype)              | TIO826                   | Canada: Ontario, Plastic Lake (45°18'N, 79°23'E)                                       | n.inf.       | n.inf.                                                    | KY688188 (SSU), KY688186 (ITS), KY688184 (LSU) | Wang <i>et al.</i> (2017)                                    |
| <i>“Gymnodinium” smaydae</i> N.S.Kang, H.J.Jeong & Moestrup (holotype)                                | GSSW10                   | western North Pacific, Yellow Sea, off South Korea: Shiwha Bay (37°18'N, 126°36'E)     | May, 2010    | n.inf.                                                    | HG005135 (SSU+ITS+LSU)                         | Kang <i>et al.</i> (2014)                                    |

|                                                                                         |                 |                                                                                           |                             |                     |                                |                                      |
|-----------------------------------------------------------------------------------------|-----------------|-------------------------------------------------------------------------------------------|-----------------------------|---------------------|--------------------------------|--------------------------------------|
| <i>Gymnoxanthella</i> sp. (isolated from <i>Spongotrochus glacialis</i> Popofsky, 1908) | n.inf.          | North Pacific                                                                             | fall, 2010                  | n.inf.              | AB860180 (rRNA)                | Ishitani <i>et al.</i> (2014)        |
| <i>Gyrodiniellum shiwhaense</i> N.S.Kang, H.J.Jeong & Moestrup (holotype)               | n.inf.          | western North Pacific, Yellow Seaa, off South Korea: Shiwha Bay (37°07'N, 126°08'E)       | Sep 1, 2009                 | N.S. Kang s.n.      | FR720082 (SSU+ITS+LSU)         | Kang <i>et al.</i> (2011)            |
| <i>“Gyrodinium” impudicum</i> S.Fraga & I.Bravo                                         | Gi-1cp          | eastern Indian Ocean, East China See, off South Korea: Yeosu                              | n.inf.                      | n.inf.              | DQ779992 (rRNA)                | Ki & Han (2007a)                     |
| <i>Histioneis</i> sp.                                                                   | FTL62           | western North Atlantic, off USA–FL: Ft. Lauderdale (26°05'N, 80°03'W)                     | Feb 26, 2008                | n.inf.              | EU780646 (SSU+ITS+LSU)         | Handy <i>et al.</i> (2009)           |
| <i>Lepidodinium viride</i> M.Watan., S.Suda, I.Inouye, Sawaguchi & Chihara              | n.inf.          | South Africa                                                                              | n.inf.                      | R.N. Pienaar s.n.   | DQ499645 (SSU+ITS+LSU)         | Grzebyk <i>et al.</i> (unpubl. 2008) |
| <i>Nematodinium</i> sp.                                                                 | UBC3 (chimeric) | eastern North Pacific, off Canada: British Columbia, Vancouver Island (48°50'N, 125°08'W) | April, 2006; April 28, 2007 | Anonymous BSL-2009a | FJ947038 (SSU), FJ947041 (LSU) | Hoppenrath <i>et al.</i> (2009)      |
| <i>Nusuttodinium acidotum</i> (Nygaard) Y.Takano & T.Horig. (reference material)        | Gaci-Japan #1   | Japan: Hokkaidō, Shinshinotsu, Lake Shinotsu (43°13'N, 141°39'E)                          | Sep 13, 2001                | Y. Takano s.n.      | AB921309 (rRNA)                | Takano <i>et al.</i> (2014)          |
| <i>Nusuttodinium aeruginosum</i> (F.Stein) Y.Takano & T.Horig.                          | Gaer-Japan #1   | Japan: Kagawa, Uto-ike Pond                                                               | Feb 9, 2001                 | Y. Takano s.n.      | AB921311 (rRNA)                | Takano <i>et al.</i> (2014)          |
| <i>Nusuttodinium aeruginosum</i> (F.Stein) Y.Takano & T.Horig.                          | Gaer-Japan #2   | Japan: Hokkaidō, Akkeshi, Tokotan-numa Pond (43°00'N, 144°52'E)                           | Dec 7, 2001                 | Y. Takano s.n.      | AB921312 (rRNA)                | Takano <i>et al.</i> (2014)          |
| <i>Nusuttodinium amphidinoides</i> (Geitler) Y.Takano & T.Horig. (reference material)   | Aamp-Japan #b   | Japan: Hokkaidō, Sapporo (43°04'N, 141°21'W)                                              | Apr 9, 2003                 | Y. Takano s.n.      | AB921307 (rRNA)                | Takano <i>et al.</i> (2014)          |
| <i>Nusuttodinium desymbiontum</i> R.Onuma, K.Watanabe & T.Horig.                        | Fukaura         | western North Pacific, Sea of Japan, off Japan: Honshū, Aomori, Fukaura                   | May 5, 2012                 | R. Onuma s.n.       | LC027036 (SSU), LC027054 (LSU) | Onuma <i>et al.</i> (2015)           |



|                                                                                                    |                                                  |                                                                                                             |                 |                                                                                                    |                                                   |                                          |
|----------------------------------------------------------------------------------------------------|--------------------------------------------------|-------------------------------------------------------------------------------------------------------------|-----------------|----------------------------------------------------------------------------------------------------|---------------------------------------------------|------------------------------------------|
| <i>Nusuttodinium poecilochroum</i><br>(J.Larsen) Y.Takano & T.Horig.                               | Hokuto                                           | western North Pacific, off<br>Japan: Hokkaidō, Hokuto                                                       | May 12,<br>2012 | R. Onuma s.n.                                                                                      | LC027047 (SSU),<br>LC027065 (LSU)                 | Onuma <i>et al.</i><br>(2015)            |
| <i>Ornithocercus magnificus</i> F.Stein                                                            | CBC4L7                                           | western North Atlantic, off<br>USA–VA: shelf break off lower<br>Chesapeake Bay (36°20'N,<br>74°44'W)        | Oct 15,<br>2007 | n.inf.                                                                                             | EU780649 (SSU+ITS+LSU)                            | Handy <i>et al.</i><br>(2009)            |
| <i>Phalacroma rapa</i> Jørg.                                                                       | CBC4L5                                           | western North Atlantic, off<br>USA–VA: shelf break off lower<br>Chesapeake Bay (36°20'N,<br>74°44'W)        | Oct 15,<br>2007 | n.inf.                                                                                             | EU780655 (SSU+ITS+LSU)                            | Handy <i>et al.</i><br>(2009)            |
| <i>Phalacroma</i> cf. <i>rotundatum</i><br>(Clap. & J.Lachm.) Kof. &<br>J.R.Michener               | FTL121                                           | western North Atlantic, off<br>USA–FL: Ft. Lauderdale<br>(26°05'N, 80°03'W)                                 | Feb 26,<br>2008 | n.inf.                                                                                             | EU780657 (SSU+ITS+LSU)                            | Handy <i>et al.</i><br>(2009)            |
| <i>Polykrikos geminatum</i> (F.Schütt)<br>D.J.Qiu & Senjie Lin                                     | n.inf.                                           | western North Pacific, South<br>China Sea, off China: Zhuhai,<br>Pearl River Estuary (22°10'N,<br>113°38'E) | Aug 24,<br>1011 | n.inf.                                                                                             | JX967270 (SSU+ITS+LSU),<br>JX967273 (cyb)         | Qiu <i>et al.</i> (2013)                 |
| <i>Spiniferodinium galeiforme</i><br>T.Horig. & Chihara                                            | n.inf.                                           | n.inf.                                                                                                      | n.inf.          | M. Tamura s.n.                                                                                     | AB921297 (SSU),<br>AB921298 (LSU)                 | Takano <i>et al.</i><br>(2014)           |
| <i>Spiniferodinium limneticum</i><br>(Wołosz.) Kretschmann &<br>Gottschling                        | GeoM 517<br>(≡<br>CCAC5092B,<br>CCBA AA-<br>276) | Poland: Lesser Poland, Tatra,<br>Zakopane (49°17'N, 19°57'E)                                                | Sep 11,<br>2012 | M. Gottschling, C.<br>Zinßmeister, N.H. Filipowicz<br>& P.M. Owsianny [J.<br>Kretschmann P6] PL002 | KR362900 (SSU+ITS+LSU)                            | Kretschmann <i>et al.</i> (2015)         |
| <i>Spiniferodinium palustre</i><br>(A.J.Schill.) Kretschmann &<br>Gottschling (reference material) | GeoM*719                                         | Poland: Lesser Poland, Tatra,<br>Litworowy Staw Gąsienicowy<br>(49°14'N, 20°00'E, 1618m)                    | Sep 22,<br>2015 | P.M. Owsianny, K. Trawiński<br>& G. Marciniak [J.<br>Kretschmann] PL018                            | MH497023<br>(SSU+ITS+LSU),<br>MH497042 (LSUd8d10) | Žerdoner Čalasan<br><i>et al.</i> (2019) |
| <i>Spiniferodinium palustre</i><br>(A.J.Schill.) Kretschmann &<br>Gottschling                      | n.inf.                                           | Japan: Hokkaidō, Lake Shikotsu                                                                              | Oct 23,<br>2005 | Y. Takano s.n.                                                                                     | AB921299 (SSU),<br>AB921300 (LSU)                 | Takano <i>et al.</i><br>(2014)           |
| <i>Warnowia</i> sp.                                                                                | BC                                               | eastern North Pacific, off<br>Canada: British Columbia,<br>Vancouver Island (48°50'N,<br>125°08'W)          | May 2,<br>2007  | Anonymous BSL-2009a                                                                                | FJ947040 (SSU),<br>FJ947042 (LSU)                 | Hoppenrath <i>et al.</i><br>(2009)       |

## References

- ANNENKOVA, N.V., BELYKH, O.I., DENIKINA, N.N., & BELIKOV, S.I. (2009). Identification of dinoflagellates from the Lake Baikal on the basis of molecular genetic data. *Doklady, Biological Sciences. Proceedings of the Academy of Sciences of the USSR* **426**: 253–256.
- BRUMMITT, R.K. & POWELL, C.E. (1992). *Authors of plant names: A list of authors of scientific names of plants, with recommended standard forms of their names, including abbreviations*. Royal Botanic Gardens, Kew.
- CAILLAUD, A., DE LA IGLESIA, P., CAMPAS, M., ELANDALOUSSI, L., FERNANDEZ, M., MOHAMMAD-NOOR, N., ANDREE, K., & DIOGENE, J. (2010). Evidence of okadaic acid production in a cultured strain of the marine dinoflagellate *Prorocentrum rathymum* from Malaysia. *Toxicon* **55**: 633–637.
- CHARVET, S., VINCENT, W.F., & LOVEJOY, C. (2012). Chrysophytes and other protists in High Arctic lakes: Molecular gene surveys, pigment signatures and microscopy. *Polar Biology* **35**: 733–748.
- DAUGBJERG, N., JENSEN, M.H., & HANSEN, P.J. (2013). Using nuclear-encoded LSU and SSU rDNA sequences to identify the eukaryotic endosymbiont in *Amphisolenia bidentata* (Dinophyceae). *Protist* **164**: 411–422.
- FAUST, M.A., VANDERSEA, M.W., KIBLER, S.R., TESTER, P.A., & LITAKER, R.W. (2008). *Prorocentrum levis*, a new benthic species (dinophyceae) from a mangrove island, Twin Cays, Belize. *Journal of Phycology* **44**: 232–240.
- GÓMEZ, F., ONUMA, R., ARTIGAS, L.F., & HORIGUCHI, T. (2015). A new definition of *Adenoides eludens*, an unusual marine sand-dwelling dinoflagellate without cingulum, and *Pseudadenoides kofoidii* gen. & comb. nov for the species formerly known as *Adenoides eludens*. *European Journal of Phycology* **50**: 125–138.
- GU, H., LUO, Z., MERTENS, K.N., PRICE, A.M., TURNER, R.E., & RABALAIS, N.N. (2015). Cyst-motile stage relationship, morphology, ultrastructure, and molecular phylogeny of the gymnodinioid dinoflagellate *Barrufeta resplendens* comb. nov., formerly known as *Gyrodinium resplendens*, isolated from the Gulf of Mexico. *Journal of Phycology* **51**: 990–999.
- HAN, M.-S., WANG, P., KIM, J.H., CHO, S.-Y., PARK, B.S., KIM, J.-H., KATANO, T., & KIM, B.-H. (2016). Morphological and molecular phylogenetic position of *Prorocentrum micans* sensu stricto and description of *Prorocentrum koreanum* sp. nov. from southern coastal waters in Korea and Japan. *Protist* **167**: 32–50.
- HANDY, S.M., BACHVAROFF, T.R., TIMME, R.E., COATS, D.W., KIM, S., & DELWICHE, C.F. (2009). Phylogeny of four Dinophysiacean genera (Dinophyceae, Dinophysiales) based on rDNA sequences from single cells and environmental samples. *Journal of Phycology* **45**: 1163–1174.
- HENRICHS, D.W., SCOTT, P.S., STEIDINGER, K.A., ERRERA, R.M., ABRAHAM, A., & CAMPBELL, L. (2013). Morphology and phylogeny of *Prorocentrum texanum* sp. nov. (Dinophyceae): A new toxic dinoflagellate from the Gulf of Mexico coastal waters exhibiting two distinct morphologies. *Journal of Phycology* **49**: 143–155.
- HERRERA SEPÚLVEDA, A., MEDLIN, L.K., MURUGAN, G., SIERRA-BELTRÁN, A.P., CRUZ-VILLACORTA, A.A., & HERNÁNDEZ-SAAVEDRA, N.Y. (2015). Are *Prorocentrum hoffmannianum* and *Prorocentrum belizeanum* (Dinophyceae, Prorocentrales), the same species? An integration of morphological and molecular data. *Journal of Phycology* **51**: 173–188.
- HOPPENRATH, M., BACHVAROFF, T.R., HANDY, S.M., DELWICHE, C.F., & LEANDER, B.S. (2009). Molecular phylogeny of ocelloid-bearing dinoflagellates (Warnowiaceae) as inferred from SSU and LSU rDNA sequences. *BMC Evolutionary Biology* **9**: 116.
- ISHITANI, Y., UJIE, Y., & TAKISHITA, K. (2014). Uncovering sibling species in Radiolaria: Evidence for ecological partitioning in a marine planktonic protist. *Molecular Phylogenetics and Evolution* **78**: 215–222.
- JENSEN, M.H. & DAUGBJERG, N. (2009). Molecular phylogeny of selected species of the order Dinophysiales (Dinophyceae)—Testing the hypothesis of a dinophysoid radiation. *Journal of Phycology* **45**: 1136–1152.
- KANG, N.S., JEONG, H.J., MOESTRUP, Ø., LEE, S.Y., LIM, A.S., JANG, T.Y., LEE, K.H., LEE, M.J., JANG, S.H., POTVIN, É., LEE, S.K., & NOH, J.H. (2014). *Gymnodinium smaydae* n. sp., a new planktonic phototrophic

- dinoflagellate from the coastal waters of Western Korea: Morphology and molecular characterization. *Journal of Eukaryotic Microbiology* **61**: 182–203.
- KANG, N.S., JEONG, H.J., MOESTRUP, Ø., & PARK, T.G. (2011). *Gyrodiniellum shiwhaense* n. gen., n. sp., a new planktonic heterotrophic dinoflagellate from the coastal waters of Western Korea: Morphology and ribosomal DNA gene sequence. *Journal of Eukaryotic Microbiology* **58**: 284–309.
- KI, J.-S. & HAN, M.-S. (2007a). Cryptic long internal repeat sequences in the ribosomal DNA ITS1 gene of the dinoflagellate *Cochlodinium polykrikoides* (Dinophyceae): A 101 nucleotide six-repeat track with a palindrome-like structure. *Genes & Genetic Systems* **82**: 161–166.
- KI, J.-S. & HAN, M.-S. (2007b). Informative characteristics of 12 divergent domains in complete large subunit rDNA sequences from the harmful dinoflagellate genus, *Alexandrium* (Dinophyceae). *Journal of Eukaryotic Microbiology* **54**: 210–219.
- KRETSCHMANN, J., FILIPOWICZ, N.H., OWSIANNY, P.M., ZINBMEISTER, C., & GOTTSCHLING, M. (2015). Taxonomic clarification of the unusual dinophyte *Gymnodinium limneticum* Wołosz. (Gymnodiniaceae) from the Tatra Mountains. *Protist* **166**: 621–637.
- LEBLOND, J.D., LASITER, A.D., LI, C., LOGARES, R., RENGEFORS, K., & EVENS, T.J. (2010). A data mining approach to dinoflagellate clustering according to sterol composition: Correlations with evolutionary history. *International Journal of Data Mining and Bioinformatics* **4**: 431–451.
- LIM, A.S., JEONG, H.J., JANG, T.Y., KANG, N.S., LEE, S.Y., YOO, Y.D., & KIM, H.S. (2013). Morphology and molecular characterization of the epiphytic dinoflagellate *Prorocentrum* cf. *rhathymum* in temperate waters off Jeju Island, Korea. *Ocean Science Journal* **48**: 1–17.
- LIN, S., ZHANG, H., & JIAO, N.Z. (2006). Potential utility of mitochondrial cytochrome b and ITS mRNA editing in resolving closely related dinoflagellates: A case study of *Prorocentrum* (Dinophyceae). *Journal of Phycology* **42**: 646–654.
- LUO, Z., HUA, Z., KROCK, B., LU, S., YANG, W., & GU, H. (2017). Morphology, molecular phylogeny and okadaic acid production of epibenthic *Prorocentrum* (Dinophyceae) species from the northern South China Sea. *Algal Research-Biomass Biofuels and Bioproducts* **22**: 14–30.
- MOHAMMAD-NOOR, N., MOESTRUP, Ø., & DAUGBJERG, N. (2007). Light, electron microscopy and DNA sequences of the dinoflagellate *Prorocentrum concavum* (syn. *P. arabianum*) with special emphasis on the periflagellar area. *Phycologia* **46**: 549–564.
- MURRAY, S.A., IP, C.L.C., MOORE, R., NAGAHAMA, Y., & FUKUYO, Y. (2009). Are prorocentroid dinoflagellates monophyletic? A study of 25 species based on nuclear and mitochondrial genes. *Protist* **160**: 245–264.
- MURRAY, S.A., NAGAHAMA, Y., & FUKUYO, Y. (2007). Phylogenetic study of benthic, spine-bearing prorocentroids, including *Prorocentrum fukuyoi* sp. nov. *Phycological Research* **55**: 91–102.
- NAGAHAMA, Y., MURRAY, S.A., TOMARU, A., & FUKUYO, Y. (2011). Species boundaries in the toxic dinoflagellate *Prorocentrum lima* (Dinophyceae, Prorocentrales), based on morphological and phylogenetic characters. *Journal of Phycology* **47**: 178–189.
- NDHLOVU, A., DHAR, N., GARG, N., XUMA, T., PITCHER, G.C., SYM, S.D., & DURAND, P.M. (2017). A red tide forming dinoflagellate *Prorocentrum triestinum*: Identification, phylogeny and impacts on St Helena Bay, South Africa. *Phycologia* **56**: 649–665.
- ONUMA, R., WATANABE, K., & HORIGUCHI, T. (2015). *Pellucidodinium psammophilum* gen. & sp. nov. and *Nusuttodinium desymbiontum* sp. nov. (Dinophyceae), two novel heterotrophs closely related to kleptochloroplastidic dinoflagellates. *Phycologia* **54**: 192–209.
- PEARCE, I. & HALLEGRAEFF, G.M. (2004). Genetic affinities, ecophysiology and toxicity of *Prorocentrum playfairii* and *P. foveolata* (Dinophyceae) from Tasmanian freshwaters. *Phycologia* **43**: 271–281.
- QIU, D., HUANG, L., LIU, S., ZHANG, H., & LIN, S. (2013). Apical groove type and molecular phylogeny suggests reclassification of *Cochlodinium geminatum* as *Polykrikos geminatum*. *PLoS One* **8**: e71346.
- RAHO, N., PIZARRO, G., ESCALERA, L., REGUERA, B., & MARÍN, I. (2008). Morphology, toxin composition and molecular analysis of *Dinophysis ovum* Schütt, a dinoflagellate of the "*Dinophysis acuminata* complex". *Harmful Algae* **7**: 839–848.

- RAHO, N., RODRÍGUEZ, F., REGUERA, B., & MARÍN, I. (2013). Are the mitochondrial *cox1* and *cob* genes suitable markers for species of *Dinophysis* Ehrenberg? *Harmful Algae* **28**: 64–70.
- ROMEIKAT, C., KNECHTEL, J., & GOTTSCHLING, M. (2020). Clarifying the taxonomy of *Gymnodinium fuscum* var. *rubrum* from Bavaria (Germany) and placing it in a molecular phylogeny of the Gymnodiniaceae (Dinophyceae). *Systematics and Biodiversity* **18**: 102–115.
- SALDARRIAGA ECHAVARRÍA, J.F., TAYLOR, F.J.R., CAVALIER-SMITH, T., MENDEN-DEUERD, S., & KEELING, P.J. (2004). Molecular data and the evolutionary history of dinoflagellates. *European Journal of Protistology* **40**: 85–111.
- SAUNDERS, G.W., HILL, D.R.A., SEXTON, J.P., & ANDERSEN, R.A. (1997). Small-subunit ribosomal RNA sequences from selected dinoflagellates: Testing classic evolutionary hypotheses with molecular systematic methods. *Plant Systematics and Evolution (Supplement)* **11**: 237–259.
- STERN, R.F., ANDERSEN, R.A., JAMESON, I., KÜPPER, F.C., COFFROTH, M.-A., VAULOT, D., LE GALL, F., VÉRON, B., BRAND, J.J., SKELTON, H., KASAI, F., LILLY, E.L., & KEELING, P.J. (2012). Evaluating the ribosomal Internal Transcribed Spacer (ITS) as a candidate dinoflagellate barcode marker. *PLoS One* **7**: e42780.
- TAKANO, Y., YAMAGUCHI, H., INOUE, I., MOESTRUP, Ø., & HORIGUCHI, T. (2014). Phylogeny of five species of *Nusuttodinium* gen. nov. (Dinophyceae), a genus of unarmoured kleptoplastidic dinoflagellates. *Protist* **165**: 759–778.
- TILLMANN, U., GOTTSCHLING, M., NÉZAN, E., KROCK, B., & BILLEN, G. (2014). Morphological and molecular characterization of three new *Azadinium* species (Amphidomataceae, Dinophyceae) from the Irminger Sea. *Protist* **165**: 417–444.
- TILLMANN, U., HOPPENRATH, M., & GOTTSCHLING, M. (2019). Reliable determination of *Prorocentrum micans* Ehrenb. (Prorocentrales, Dinophyceae) based on newly collected material from the type locality. *European Journal of Phycology* **54**: 417–431.
- WAKEMAN, K.C., HOPPENRATH, M., YAMAGUCHI, A., GAVELIS, G.S., LEANDER, B.S., & NOZAKI, H. (2018). Ultrastructure of the marine benthic dinoflagellate *Plagiodinium belizeanum* (Dinophyceae) from the southeast Pacific island of Okinawa, Japan. *Phycologia* **57**: 209–222.
- WANG, N., LUO, Z., MERTENS, K.N., MCCARTHY, F.M.G., GU, L., & GU, H. (2017). Cyst-motile stage relationship and molecular phylogeny of a new freshwater dinoflagellate *Gymnodinium plasticum* from Plastic Lake, Canada. *Phycological Research* **65**: 312–321.
- YAMADA, N., DAWUT, M., TERADA, R., & HORIGUCHI, T. (2019). *Plagiodinium ballux* sp. nov. (Dinophyceae), a deep (36 m) sand dwelling dinoflagellate from subtropical Japan. *Phycological Research* **67**: 12–20.
- YAMADA, N., TERADA, R., TANAKA, A., & HORIGUCHI, T. (2013). *Bispinodinium angelaceum* gen. et sp. nov. (Dinophyceae), a new sand-dwelling dinoflagellate from the seafloor off Mageshima Island, Japan. *Journal of Phycology* **49**: 555–569.
- ZARDOYA, R., COSTAS, E., LÓPEZ-RODAS, V., GARRIDO-PERTIERRA, A., & BAUTISTA, J.M. (1995). Revised dinoflagellate phylogeny inferred from molecular analysis of large-subunit ribosomal RNA gene sequences. *Journal of Molecular Evolution* **41**: 637–645.
- ŽERDONER ČALASAN, A., KRETSCHMANN, J., & GOTTSCHLING, M. (2019). They are young, and they are many: Dating freshwater lineages in unicellular dinophytes. *Environmental Microbiology* **21**: 4125–4135.
- ZHANG, B.-Y., WANG, G.-C., ZHANG, Y., HAN, X.-T., LO, S.-H., QI, Y.-Z., ZOU, J.-Z., & ZENG, C.-K. (2004). 东海原甲藻 (*Prorocentrum donghaiense*) 和海洋原甲藻 APBM (*P.micans* APBM) 的 5.8S rDNA 及其转录间隔区 (ITS) 的克隆和序列分析. *Oceanologia et limnologia sinica* **35**: 265–272.
